# Supplementary material for: Two-Step Source Tracing Strategy of Yersinia pestis and Its Historical Epidemiology in a Specific Region
Source: PLoS One. 2014 Jan 9;9(1):e85374. doi: 10.1371/journal.pone.0085374 (PMC3887043; doi:10.1371/journal.pone.0085374)
Supplement: Table S1 — Y. pestis strains sequenced in previously research. (XLS) [file pone.0085374.s002.xls]

## Sheet: Sheet3
Supplementary Table 1. Y. pestis strains sequenced in previously research
New Strain ID	Node	Subgroup	Biovar	Year	Host/vector	Source	Accession
42013	0.ANT1a	0.ANT1	Antiqua	1971	Citellus undulatus	Xinjiang Wusu, China	ADPG00000000 47685
B42003004	0.ANT2a	0.ANT2	Antiqua	2003	Marmota baibacina	Xinjiang Wenquan, China	NZ_AAYU00000000
A1956001	0.ANT3b	0.ANT3	Antiqua	1956	Marmota caudata	Xinjiang Wuqia, China	ADPX00000000 47685
PestoidesF	0.PE2a	0.PE2	Microtus	<1984		FSU	NC_009381
Angola	0.PE3a	0.PE3	Microtus	<1984		Africa	NC_010159
CMCCN010025	0.PE4d	0.PE4d	Microtus	2000	Microtus fuscus	Sichuan Shiqu, China	ADRT00000000 47685
91001	0.PE4i	0.PE4i	Microtus	1970	Microtus brandti	Inner Mongolia Abagaqi, China	NC_005810
620024*	0.PE7b	0.PE7	Antiqua	1962	Patient	Qinghai Xinghai, China	ADPM00000000 47685
Antiqua	1.ANTa	1.ANT	Antiqua	1965	Patient	Congo	NC_008150
K21985002	1.IN1c	1.IN1	Antiqua	1985	Marmota himalayana	Xinjiang Ruoqiang, China	ADSS00000000 47685
E1979001	1.IN3b	1.IN3	Antiqua	1979	Eothenomys miletus	Yunnan Jianchuan, China	NZ_AAYV00000000
CMCC114001	1.ORI1a	1.ORI1	Orientalis	1952	Mus musculus	Fujian, China	ADQL00000000 47685
F1984001	1.ORI2g	1.ORI2	Orientalis	1984	Rattus flavipectus	Yunnan Yingjiang, China	ADSD00000000 47685
MG05	1.ORI3b	1.ORI3	Orientalis	2005	Patient	Antananarivo, Madagascar	NZ_AAYS00000000
Nepal516	2.ANT1c	2.ANT1	Antiqua	1967	Patient	Nepal	NZ_ACNQ00000000
G1996006	2.ANT2d	2.ANT2	Antiqua	1996	Patient	Tibet Cuona, China	ADSE00000000 47685
H1959004	2.ANT3j	2.ANT3	Antiqua	1959	Rattus norvegicus	Jilin Fuyu, China	ADSI00000000 47685
KIM	2.MED1a	2.MED1	Mediaevalis	1968	Patient	Iran/Kurdistan	NC_004088
K11973002	2.MED2c	2.MED2	Mediaevalis	1973	Marmota himalayana	Xinjiang Hetian, China	NZ_AAYT00000000
J1963002	2.MED3a	2.MED3	Mediaevalis	1963	Citellophilus tesquorum sungaris	Gansu Huining, China	ADSP00000000 47685
C1976001	3.ANT1c	3.ANT1	Antiqua	1976	Marmota himalayana	Gansu Akesai, China	ADQA00000000 47685
MGJZ6	3.ANT2a	3.ANT2	Antiqua	1997	Meriones meridianus	Dornogovi, Mongolia	ADSX00000000 47685
MGJZ12	4.ANT1a	4.ANT1	Antiqua	2002	Marmota sibirica	Bayan-Ölgii, Mongolia	ADSV00000000 47685
CMCC640047*	1.IN2a	1.IN2	Antiqua	1964	Patient	Qinghai Gonghe, China	ADRA00000000 47685
30017*	1.IN2b	1.IN2	Antiqua	1976	Marmota himalayana	Tibet Naqu, China	ADPC00000000 47685
CMCC31004*	1.IN2c	1.IN2	Antiqua	1990	Marmota himalayana	Tibet Anduo, China	ADQR00000000 47685
C1975003*	1.IN2d	1.IN2	Antiqua	1975	Ovis avies	Qinghai Yushu, China	ADPZ00000000 47685
C1989001*	1.IN2e	1.IN2	Antiqua	1989	Patient	Qinghai Zhaduo, China	ADQB00000000 47685
710317*	1.IN2f	1.IN2	Antiqua	1971	Patient	Qinghai Huangyuan, China	ADPP00000000 47685
CMCC05013*	1.IN2g	1.IN2	Antiqua	1988	Linognathoides palaearctus	Qinghai Xinghai, China	ADQF00000000 47685
5*	1.IN2h	1.IN2	Antiqua	2004	Patient	Qinghai Wulan, China	ADPK00000000 47685
CMCC10012*	1.IN2i	1.IN2	Antiqua	1964	Ixodex crenulatus	Qinghai Haiyan, China	ADQG00000000 47685
CMCC27002*	1.IN2j	1.IN2	Antiqua	1991	Marmota himalayana	Qinghai Tongde, China	ADQQ00000000 47685
970754*	1.IN2k	1.IN2	Antiqua	1997	Ovis avies	Qinghai Nangqian, China	ADPW00000000 47685
D1991004*	1.IN2l	1.IN2	Antiqua	1991	Marmota himalayana	Qinghai Zeku, China	ADRX00000000 47685
D1964002*	1.IN2m	1.IN2	Antiqua	1964	Canis faliaris	Qinghai Menyuan, China	ADRV00000000 47685
CMCC02041*	1.IN2n	1.IN2	Antiqua	1965	Mustela eversmanni	Qinghai Qilian, China	ADQC00000000 47685
CMCC03001*	1.IN2o	1.IN2	Antiqua	1954	Ochotona daurica	Qinghai Henan, China	ADQD00000000 47685
D1982001*	1.IN2p	1.IN2	Antiqua	1982	Patient	Gansu Sunan, China	ADRW00000000 47685
D1964001*	1.IN2q	1.IN2	Antiqua	1964	Marmota himalayana	Qinghai Menyuan, China	ADRU00000000 47685
*: Isolates used in Figure 3A, CMCC05013 and 620024 were used both in Figure2A and Figure3A.
